1 Performance of Deep Learning Models in Predicting the Nugent Score to Diagnose Bacterial  
2 Vaginosis

3

4 Running title: Deep Learning Model for the Bacterial Vaginosis

5

6 Naoki Watanabe,<sup>a,#</sup> Tomohisa Watari,<sup>a</sup> Kenji Akamatsu,<sup>b</sup> Isao Miyatsuka,<sup>b</sup> Yoshihito Otsuka,<sup>a</sup>

7

8 <sup>a</sup>Department of Clinical Laboratory, Kameda Medical Center, Higashi-cho 929, Kamogawa,

9 Chiba, Japan

10 <sup>b</sup> CarbGeM Inc., 1-5-13 Jinnan, Shibuya-ku, Tokyo, Japan

11

12

13 #Address correspondence to Naoki Watanabe, [watanabe.naoki.4@kameda.jp](mailto:watanabe.naoki.4@kameda.jp).

14

15 Word counts:

16 Abstract: 240; Importance: 142

17

18

19 **ABSTRACT**

20 The Nugent score is a commonly used tool for diagnosing bacterial vaginosis; however, its accuracy  
21 depends on the skills of laboratory technicians. We aimed to evaluate the performance of deep  
22 learning models in predicting the Nugent score, with the goal of improving diagnostic consistency  
23 and accuracy. A total of 1,510 vaginal images collected from a hospital in Japan between 2021 and  
24 2023 were assessed. Each image was annotated by laboratory technicians into one of four  
25 categories based on the Nugent score—normal vaginal flora, absence of vaginal flora, altered  
26 vaginal flora, or bacterial vaginosis. Deep learning models were developed to predict these  
27 categories, and their performance was evaluated by comparing the predicted scores with technician  
28 annotations. A high magnification model was further optimized and evaluated using an independent  
29 test set of 106 images to assess its performance relative to that of the technicians. The deep learning  
30 models demonstrated an accuracy of 84% at low magnification and 89% at high magnification in  
31 predicting the Nugent score categories. After optimization, the high magnification model achieved  
32 94% accuracy, surpassing the average 92% accuracy of the technicians. The agreement between  
33 deep learning model predictions and technician annotations was 92% for normal vaginal flora,  
34 100% for absence of vaginal flora, 91% for altered vaginal flora, and 100% for bacterial vaginosis.  
35 The deep learning models demonstrated accuracy comparable to that of laboratory technicians,  
36 which indicates their potential utility in improving the diagnostic accuracy of bacterial vaginosis.

## 37 **IMPORTANCE**

38 Bacterial vaginosis is a global health issue affecting women, causing symptoms such as abnormal  
39 vaginal discharge and discomfort. The Nugent score is the standard method for diagnosing bacterial  
40 vaginosis and is based on manual interpretation of Gram-stained vaginal smears. However, this  
41 method relies on the skill and experience of trained professionals, leading to variability in results  
42 and challenges in facilities with limited access to such experts. This poses significant challenges  
43 for settings with limited access to experienced technicians. The deep learning models developed in  
44 this study predict the Nugent score with high accuracy; thus, they can be used to standardize the  
45 diagnosis of bacterial vaginosis, reduce observer variability, and enable reliable diagnosis even in  
46 settings without experienced personnel. Although larger scale validation is needed, our results  
47 suggest that deep learning models may represent a new approach for the diagnosis of bacterial  
48 vaginosis.

## 49 **INTRODUCTION**

50 Bacterial vaginosis (BV) is a prevalent vaginal condition characterized by a shift from the normal  
51 *Lactobacillus* species to *Gardnerella vaginalis* and other BV-associated bacteria (1). It affects 23–  
52 29% of women worldwide, with regional variations (2). BV is associated with the risk of sexually

53 transmitted infections, including *Chlamydia trachomatis*, *Trichomonas vaginalis* (3), *Mycoplasma*  
54 *genitalium* (4), human papillomavirus (5), and herpes simplex virus type 2 (6). BV is also  
55 associated with preterm birth (7) and neonatal complications (8) in pregnant women.

56 BV is typically diagnosed using the Amsel's diagnostic criteria (9) and the Nugent score, which  
57 is determined by vaginal Gram staining (10). The Amsel criteria evaluate clinical symptoms and  
58 signs (9), whereas the Nugent score, ranging from 0 to 10, reflects the bacterial patterns in vaginal  
59 specimens (10). The Nugent score is valued for its low cost, quick turnaround time, and minimal  
60 equipment requirements. However, its accuracy varies depending on the skill and experience of the  
61 clinician.

62 Recent advances in deep learning, particularly convolutional neural networks (CNNs) (11),  
63 have shown promise for pattern recognition in images and speech, with potential applications in  
64 medical image classification. In infectious disease research, CNNs have been used for the  
65 automated interpretation of blood culture Gram staining (12) and BV classification (13). Wang et  
66 al. developed a CNN model to classify Nugent scores into three categories using high-  
67 magnification microscopic images, achieving 82% sensitivity and 97% specificity (13). Despite  
68 the potential of CNNs for diagnosing BV, improving their accuracy and automation capabilities  
69 remains challenging.

70 In this study, a CNN model was developed to classify vaginal images into four groups based

71 on the Nugent scoring system. Traditionally, the Nugent score uses three categories, with scores  
72 ranging from 4 to 6, typically indicating altered vaginal flora. However, a score of 4 may indicate  
73 the absence of vaginal flora rather than their alteration. Given the different microscopic patterns of  
74 the altered and absent vaginal flora, we refined our model to accurately differentiate between these  
75 conditions. We evaluated the proposed BV models using both low- and high-magnification images.  
76 Low-magnification images that do not require oil immersion simplify the process and facilitate  
77 automation.

## 78 **RESULTS**

### 79 **Prediction performance of the BV model**

80 Table 1 shows the agreement between the predicted classifications of the BV model and true label  
81 groups. The high-magnification model accurately predicted 277 of 310 samples based on the  
82 Nugent score, whereas the low-magnification model identified the correct category in 260 of the  
83 310 samples. Table 2 presents the agreement and accuracy rates for both high- and low-  
84 magnification models. In the four-group classification, the high-magnification model demonstrated  
85 better agreement rates across all categories. The lowest agreement rate was observed for identifying  
86 altered vaginal flora, with the high-magnification model at 57% and the low-magnification model

87 at 50%. In this classification, the high-magnification model achieved an accuracy of 89%,  
88 surpassing that of the low-magnification model (84%).

89 Of the 310 samples, 130 were classified as non-BV and the remaining 180 were classified as  
90 BV. In the two-group classification, the low-magnification model had an accuracy of 94%  
91 (292/310), which was slightly lower than that of the high-magnification model (95%, 294/310).  
92 For the BV group, the agreement rate with the 400× model reached 100%, which was higher than  
93 that of the high-magnification model (92%). In the non-BV group, the agreement rate was lower  
94 (88%) for the low-magnification model than that of the high-magnification model (99%).

#### 95 **Development and provisional performance of the advanced BV model**

96 The high-magnification model, which initially exhibited greater accuracy, was further improved  
97 through additional learning. For this purpose, 430 new images were included for a total of 1,510  
98 images used to develop the advanced BV model. The revised image distribution across the Nugent  
99 score categories included 450 images of normal vaginal flora, 490 images of no vaginal flora, 300  
100 images of altered vaginal flora, and 700 images of bacterial vaginosis. In the interim evaluation,  
101 the advanced BV model achieved an accuracy rate of 92% in the four-group classification,  
102 representing a 3% improvement over an earlier version of the model.

### 103 **Comparison of the advanced BV model and human experts in predicting BV**

104 To assess the performance of the advanced BV model in differentiating between bacterial vaginosis  
105 and non-BV cases, an image was obtained from each of the 106 vaginal discharge specimens. The  
106 composition of these samples was as follows: 61 (58%) had normal vaginal flora, 10 (9%) had no  
107 vaginal flora, 14 (13%) had altered vaginal flora, and 21 (20%) had BV. These were classified into  
108 71 non-BV (67%) and 35 BV (33%) samples. Table 3 shows the agreement between the predicted  
109 classifications of the advanced BV model and true label groups. For four-group classification, the  
110 advanced BV model achieved an accuracy of 94% (Table 4). The accuracies observed for the two  
111 laboratory technicians were 87% and 96%, respectively, and the collective average accuracy for  
112 the laboratory technicians was 92%. Altered vaginal flora had the lowest prediction accuracy,  
113 whereas the advanced BV model showed a 91% agreement rate.

114 In the two-group classification, both the advanced BV model and technicians demonstrated  
115 sensitivities greater than 80%, specificities greater than 96%, and accuracies greater than 93%. The  
116 sensitivity of the advanced BV model was 86% (95% CI: 70–95%), which was 4% lower than the  
117 average sensitivity of 90% achieved by the technicians. Conversely, the specificity of the advanced  
118 BV model was 100% (95% CI: 93–100%), which was 2% higher than that of the technicians. The  
119 overall accuracy of the advanced BV model was 95% (95% CI: 89–99%), which was comparable  
120 to the average accuracy reported by the technicians. Among the BV predictions, 14% (5/35) of the

121 samples identified as BV were incorrectly classified as non-BV by the advanced model, of which  
122 four were classified as altered vaginal flora and one was classified as BV.

### 123 **Agreement level between the advanced BV model and laboratory technicians**

124 The advanced BV model achieved an overall agreement rate of 92% (98 out of 106) with both  
125 laboratory technicians. The kappa coefficient indicated an almost perfect agreement of 0.81 (range  
126 0.68–0.94) between the advanced BV model and technician 1, and an almost perfect agreement of  
127 0.83 (range 0.71–0.94) with technician 2. The inter-technician agreement rate was 91% (96 out of  
128 106), with a kappa coefficient of 0.78 (range 0.65–0.91), indicating substantial agreement between  
129 technician 1 and technician 2.

## 130 **DISCUSSION**

131 We developed a CNN model to predict Nugent scores from vaginal Gram stains and achieved 94%  
132 accuracy across a four-group classification. This result surpassed the performance reported by  
133 Wang et al. (13), who achieved 80% accuracy for three Nugent score groups in a test set created  
134 from images at a single facility. Our CNN model differs from that proposed by Wang et al. with  
135 respect to the underlying base model, which includes an additional Nugent score group. Our



136 approach used ConvNeXt (14), which differed from the EfficientNet (15) used by Wang et al. (13).  
137 Further, their model categorized scores into three groups, whereas our study expands these to four  
138 groups. These changes likely contributed to the improved model accuracy.

139 Our model effectively matched the laboratory technicians in classifying BV and non-BV with  
140 an accuracy of 95%, sensitivity of 86%, and specificity of 100% in the two-group classification.  
141 Wang et al. reported a sensitivity of 89% and a specificity of 85% (13). Although our model showed  
142 sensitivities <90%, similar to the model by Wang et al., it primarily misclassified samples with  
143 altered vaginal flora as normal flora. Moreover, both the CNN models and human technicians found  
144 it difficult to accurately identify altered vaginal flora, as evidenced by the low average agreement  
145 rate of 73%. Therefore, the accuracy of the CNN model must be improved, particularly for samples  
146 with altered vaginal flora.

147 A significant advantage of low-magnification images is their compatibility with automated  
148 microscopy platforms, which simplifies image acquisition. Smith et al. used an automated  
149 microscopy platform for collecting Gram-stained images at 400× magnification to develop a CNN  
150 model (12). In our study, although the low-magnification model achieved 94% accuracy in the two-  
151 group classification, it only achieved 84% accuracy in the four-group classification, highlighting  
152 the limitations of using low-magnification images in automated BV scoring. Future improvements,  
153 including refining the model by integrating more accurately classified samples, are thus crucial to

154 improve the reliability of automated BV scoring.

155 BV is a common condition in women, typically diagnosed using conventional methods and  
156 nucleic acid amplification tests (NAATs) (16–18). Conventional diagnostic tools include the  
157 Nugent score (10), Amsel's diagnostic criteria (9), OSOM BV Blue assay (19, 20), and FemExam  
158 card (21). NAATs, such as the BD Max vaginal panel (22) and Hologic Aptima BV (23) are also  
159 used. The Nugent score, which is often used as a reference method, demonstrates substantial inter-  
160 observer agreement with kappa coefficients ranging from 0.70 to 0.77 (24) and inter-center  
161 agreement ranging from 0.60 to 0.72 (25). However, interpretation of the Nugent score requires  
162 expertise, which affects its reproducibility. Our CNN model shows high BV prediction performance  
163 and provides results independent of technician skill and subjectivity, with excellent agreement rates  
164 (kappa coefficients of 0.81–0.83 with technicians). Implementing this CNN model in a clinical  
165 setting could facilitate objective and reproducible interpretation of vaginal Gram staining; hence,  
166 aiding in BV diagnosis.

167 This study has some limitations, particularly in terms of generalizability and sample size. The  
168 evaluation was limited to a single institution, which may have limited the broader applicability of  
169 the results. Factors such as sample diversity, variations in image hue, and technician skills, which  
170 may vary among institutions, could affect the model accuracy. Furthermore, the CNN model was  
171 developed using a relatively modest dataset of less than 2,000 samples, which may result in

172 undertraining and affect predictive ability. Despite these limitations, our CNN model demonstrated  
173 sensitivity, specificity, and accuracy comparable to those of technicians in the two-group  
174 classification. With an expanded dataset, we anticipate significant improvements in the predictive  
175 performance of the model, further refining its effectiveness for BV diagnosis when tested on a  
176 broader range of samples and settings.

177 In conclusion, we developed a CNN model to automatically predict BV scores, achieving an  
178 accuracy rate of 94% in the four-group classification using high magnification images. These  
179 results highlight the potential of CNN models for future applications in the automated classification  
180 of BV scores. Currently, there are limited data on the use of CNN models to predict BV scores. To  
181 establish its efficacy, this CNN model requires further validation using different vaginal specimens  
182 and clinical settings.

## 183 **MATERIALS AND METHODS**

184 This study was conducted at the Kameda Medical Center in Japan from November 2021 to  
185 February 2024. Figure 1 shows the flowchart of this study. After data collection and preprocessing,  
186 two magnification versions of the CNN model were developed for comparative evaluation. The  
187 more effective model of these was subsequently selected, improved, and subjected to final  
188 evaluation. Ethical approval was obtained from the Kameda Medical Center Ethics Committee

189 (approval number 22-128). The requirement for written informed consent from the participants was  
190 waived by the Research Ethics Committee because of the exclusive use of anonymized data in this  
191 study.

## 192 **Data collection**

193 From November 2021 to May 2023, we collected 151 Gram-stained slides from 151 vaginal  
194 discharge specimens. Gram staining was performed using Neo-B & M Wako crystal violet solution,  
195 iodine solution, decolorizing solution, and Pfeifel solution (FUJIFILM Wako Chemicals, Osaka,  
196 Japan). A Nikon ECLIPSE Ci-S microscope equipped with a DS-Fi3 digital camera was used for  
197 image acquisition. The images, focused on areas where bacteria or cells were visible, were captured  
198 at 400× (low) and 1,000× (high) magnification, each with a resolution of 2,880 × 2,048 pixels.

199 Images were categorized into four groups according to the Nugent score: normal vaginal flora  
200 (score 0–3); no vaginal flora (score 4), altered vaginal flora (scores 5–6); or BV (score 7–10).  
201 Figure 2 shows the representative slide images for each group. Nugent scores were assessed by two  
202 laboratory technicians, including at least one certified clinical microbiology specialist. In cases of  
203 disagreement, a third technician was consulted for the final decision. In total, 1,510 images at both  
204 low and high magnifications were collected from each slide. Initially, images of BV were collected  
205 and based on the Nugent scores, the distribution was as follows: 320 images for normal vaginal

206 flora, 300 for no vaginal flora, 190 for altered vaginal flora, and 700 for BV. These images were  
207 randomly allocated to the training, validation, and testing sets with 960, 240, and 310 images,  
208 respectively.

### 209 **Pre-processing of images and data augmentation**

210 We applied four preprocessing steps to the collected images: center cropping, resizing, scaling pixel  
211 values, and normalizing pixel values. Microscopic images were cropped from their original size of  
212  $2,880 \times 2,048$  pixels to a central area of  $2,048 \times 2,048$  pixels. The cropped images were resized to  
213  $1,024 \times 1,024$  pixels. The pixel values were scaled from (0, 255) to (0, 1) and normalized to RGB  
214 means of (0.485, 0.456, and 0.406) and RGB standard deviations of (0.229, 0.224, and 0.225).

215 To improve the model performance, data augmentation techniques were implemented during  
216 the learning process. These techniques included random rotation, random cropping, random  
217 horizontal and vertical flipping, random affine transformations, and color jittering. Random  
218 rotation and cropping involved arbitrary rotations and adjustments of image dimensions. Random  
219 horizontal and vertical flipping altered images by flipping them left/right and up/down, respectively.  
220 Random affine transformations and color jittering variably adjusted the affine parameters of  
221 brightness, contrast, saturation, and hue.

## 222 **Development of the BV model using a CNN**

223 Neural networks are mathematical models that emulate the functions of nerve cells in the human  
224 brain. Specifically, in image classification, these networks learn to recognize image content by  
225 iteratively processing the training data, thereby updating the connections between neurons. Among  
226 the various types of neural networks, CNNs are tailored to process image data. In our study, we  
227 used a model based on ConvNeXt, a variant of a CNN known for its state-of-the-art performance  
228 in image classification, including its high accuracy and scalability (14). We used a linear activation  
229 function in the final layer of the BV model to compute the probabilities representing the likelihood  
230 of each Nugent score group. This step is essential for effectively predicting Nugent scores based  
231 on the analyzed images.

## 232 **Evaluation of the prediction performance of the BV model**

233 The predictive performance of the BV model was evaluated for both the four- and two-group  
234 classifications derived from the BV categories. For the two-group classification, the four Nugent  
235 scores were divided into two categories: BV and non-BV, with normal and no vaginal flora being  
236 categorized as non-BV whereas altered vaginal flora and bacterial vaginosis were categorized as  
237 BV.

238 We used agreement rate and accuracy as the evaluation metrics. The agreement rate measures  
239 the consistency between the CNN model predictions and the actual labels and is expressed as a  
240 percentage. Accuracy is the proportion of correct predictions made by the CNN model compared  
241 with the actual labels over the entire dataset. For the two-group classifications, sensitivity and  
242 specificity were calculated as follows: sensitivity was the ratio of correctly predicted BV cases to  
243 the total number of actual BV cases; and specificity was the ratio of correctly predicted non-BV  
244 cases to the total number of actual non-BV cases.

#### 245 **Development of an advanced BV model**

246 Among the models developed using low- and high-magnification images, the model with superior  
247 accuracy in the four-group classification was selected for further refinement. This refinement  
248 process included the integration of additional images collected between August and October 2023,  
249 using the same methodology as in the initial development phase. We applied RandAugment (26),  
250 a method used to simplify and improve data augmentation techniques. The performance of this  
251 advanced BV model was assessed on an interim basis using the same test set of 310 images used  
252 in the initial evaluation.

#### 253 **Accuracy comparison between the advanced BV model and human assessment in BV**

254 **diagnosis**

255 An independent test set was used to compare the accuracy of the advanced BV model with that of  
256 human experts. An image was acquired for each vaginal discharge specimen collected in December  
257 2023. These images were labeled based on the criteria established during BV model development.  
258 These data were used to evaluate and compare the agreement rate, accuracy, and kappa coefficients  
259 between the advanced BV model and the laboratory technicians. Kappa coefficients were  
260 calculated to evaluate agreement between the advanced BV model and the laboratory technician.  
261 Statistical analyses were conducted using EZR version 1.64 (27).

262

263 **DATA AVAILABILITY**

264 All the data supporting the findings are provided in the article.

265 **ACKNOWLEDGMENTS**

266 We thank the technicians at Kameda Medical Center for their assistance with vaginal specimen  
267 collection and data handling.



## 268 **References**

- 269 1. Centers for Disease Control and Prevention. Sexually transmitted infections treatment  
270 guidelines 2021, bacterial vaginosis. <https://www.cdc.gov/std/treatment-guidelines/bv.htm>  
271 [Accessed 2024 Jan 14].
- 272 2. Peebles K, Velloza J, Balkus JE, McClelland RS, Barnabas RV. 2019. High global burden and  
273 costs of bacterial vaginosis: A systematic review and meta-analysis. *Sex Transm Dis*  
274 46:304–311. <http://doi.org/10.1097/OLQ.0000000000000972>.
- 275 3. Abbai NS, Reddy T, Ramjee G. 2016. Prevalent bacterial vaginosis infection - A risk factor for  
276 incident sexually transmitted infections in women in Durban, South Africa. *Int J STD AIDS*  
277 27:1283–1288. <http://doi.org/10.1177/0956462415616038>.
- 278 4. Lokken EM, Balkus JE, Kiarie J, Hughes JP, Jaoko W, Totten PA, McClelland RS, Manhart  
279 LE. 2017. Association of recent bacterial vaginosis with acquisition of *Mycoplasma*  
280 *genitalium*. *Am J Epidemiol* 186:194–201. <http://doi.org/10.1093/aje/kwx043>.
- 281 5. Brusselaers N, Shrestha S, van de Wijgert J, Verstraelen H. 2019. Vaginal dysbiosis and the  
282 risk of human papillomavirus and cervical cancer: Systematic review and meta-analysis.  
283 *Am J Obstet Gynecol* 221:9–18.e8. <http://doi.org/10.1016/j.ajog.2018.12.011>.
- 284 6. Abbai NS, Nyirenda M, Naidoo S, Ramjee G. 2018. Prevalent herpes simplex Virus-2  
285 increases the risk of incident bacterial vaginosis in women from South Africa. *AIDS Behav*  
286 22:2172–2180. <http://doi.org/10.1007/s10461-017-1924-1>.
- 287 7. Nelson DB, Hanlon A, Hassan S, Britto J, Geifman-Holtzman O, Haggerty C, Fredricks DN.  
288 2009. Preterm labor and bacterial vaginosis-associated bacteria among urban women. *J*  
289 *Perinat Med* 37:130–134. <http://doi.org/10.1515/JPM.2009.026>.
- 290 8. Laxmi U, Agrawal S, Raghunandan C, Randhawa VS, Saili A. 2012. Association of bacterial  
291 vaginosis with adverse fetomaternal outcome in women with spontaneous preterm labor: A  
292 prospective cohort study. *J Matern Fetal Neonatal Med* 25:64–67.  
293 <http://doi.org/10.3109/14767058.2011.565390>.
- 294 9. Amsel R, Totten PA, Spiegel CA, Chen KC, Eschenbach D, Holmes KK. 1983. Nonspecific  
295 vaginitis. Diagnostic criteria and microbial and epidemiologic associations. *Am J Med*  
296 74:14–22. [http://doi.org/10.1016/0002-9343\(83\)91112-9](http://doi.org/10.1016/0002-9343(83)91112-9).

- 297 10. Nugent RP, Krohn MA, Hillier SL. 1991. Reliability of diagnosing bacterial vaginosis is  
298 improved by a standardized method of Gram stain interpretation. *J Clin Microbiol* 29:297–  
299 301. <http://doi.org/10.1128/jcm.29.2.297-301.1991>.
- 300 11. Albawi S, Mohammed TA, Al-Zawi S. 2017. Understanding of a convolutional neural  
301 network, p 1–6. <http://doi.org/10.1109/ICEngTechnol.2017.8308186>. *In* vol 2017  
302 International Conference on Engineering and Technology (ICE T). IEEE Publications.
- 303 12. Smith KP, Kang AD, Kirby JE. 2018. Automated interpretation of blood culture Gram stains  
304 by use of a deep convolutional neural network. *J Clin Microbiol* 56.  
305 <http://doi.org/10.1128/JCM.01521-17>.
- 306 13. Wang Z, Zhang L, Zhao M, Wang Y, Bai H, Wang Y, Rui C, Fan C, Li J, Li N, Liu X, Wang  
307 Z, Si Y, Feng A, Li M, Zhang Q, Yang Z, Wang M, Wu W, Cao Y, Qi L, Zeng X, Geng L,  
308 An R, Li P, Liu Z, Qiao Q, Zhu W, Mo W, Liao Q, Xu W. 2021. Deep neural networks offer  
309 morphologic classification and diagnosis of bacterial vaginosis. *J Clin Microbiol* 59.  
310 <http://doi.org/10.1128/JCM.02236-20>.
- 311 14. Liu Z, Mao H, Wu C-Y, Feichtenhofer C, Darrell T, Xie S. 2022. A ConvNet for the 2020s.  
312 arXiv [cscV]. <https://arxiv.org/abs/2201.03545>.
- 313 15. Tan M, Le QV. 2019. EfficientNet: Rethinking model scaling for convolutional neural  
314 networks. arXiv [cs.LG]. <http://arxiv.org/abs/1905.11946>.
- 315 16. Muzny CA, Balkus J, Mitchell C, Sobel JD, Workowski K, Marrazzo J, Schwebke JR. 2022.  
316 Diagnosis and management of bacterial vaginosis: Summary of evidence reviewed for the  
317 2021 Centers for Disease Control and Prevention sexually transmitted infections treatment  
318 guidelines. *Clin Infect Dis* 74 Supplement 2(Suppl\_2):S144–51:S144–S151.  
319 <http://doi.org/10.1093/cid/ciac021>.
- 320 17. Miller JM, Binnicker MJ, Campbell S, Carroll KC, Chapin KC, Gilligan PH, Gonzalez MD,  
321 Jerris RC, Kehl SC, Patel R, Pritt BS, Richter SS, Robinson-Dunn B, Schwartzman JD,  
322 Snyder JW, Telford S, Theel ES, Thomson RB, Weinstein MP, Yao JD. 2018. A guide to  
323 utilization of the microbiology laboratory for diagnosis of infectious diseases: 2018 update  
324 by the Infectious Diseases Society of America and the American Society for Microbiology.  
325 *Clin Infect Dis* 67:e1–e94. <http://doi.org/10.1093/cid/ciy381>.
- 326 18. Coleman JS, Gaydos CA. 2018. Molecular diagnosis of bacterial vaginosis: An update. *J Clin*  
327 *Microbiol* 56. <http://doi.org/10.1128/JCM.00342-18>.

- 328 19. Myziuk L, Romanowski B, Johnson SC. 2003. BVBlue test for diagnosis of bacterial  
329 vaginosis. *J Clin Microbiol* 41:1925–1928. [http://doi.org/10.1128/JCM.41.5.1925-](http://doi.org/10.1128/JCM.41.5.1925-1928.2003)  
330 1928.2003.
- 331 20. Bradshaw CS, Morton AN, Garland SM, Horvath LB, Kuzevska I, Fairley CK. 2005.  
332 Evaluation of a point-of-care test, BVBlue, and clinical and laboratory criteria for diagnosis  
333 of bacterial vaginosis. *J Clin Microbiol* 43:1304–1308.  
334 <http://doi.org/10.1128/JCM.43.3.1304-1308.2005>.
- 335 21. West B, Morison L, Schim van der Loeff M, Gooding E, Awasana AA, Demba E, Mayaud P.  
336 2003. Evaluation of a new rapid diagnostic kit (FemExam) for bacterial vaginosis in  
337 patients with vaginal discharge syndrome in the Gambia. *Sex Transm Dis* 30:483–489.  
338 <http://doi.org/10.1097/00007435-200306000-00003>.
- 339 22. Gaydos CA, Beqaj S, Schwebke JR, Lebed J, Smith B, Davis TE, Fife KH, Nyirjesy P,  
340 Spurrell T, Furgerson D, Coleman J, Paradis S, Cooper CK. 2017. Clinical validation of a  
341 test for the diagnosis of vaginitis. *Obstet Gynecol* 130:181–189.  
342 <http://doi.org/10.1097/AOG.0000000000002090>.
- 343 23. Schwebke JR, Taylor SN, Ackerman R, Schlaberg R, Quigley NB, Gaydos CA, Chavoustie  
344 SE, Nyirjesy P, Remillard CV, Estes P, McKinney B, Getman DK, Clark C. 2020. Clinical  
345 validation of the APTIMA bacterial vaginosis and APTIMA candida/trichomonas vaginitis  
346 assays: Results from a prospective multicenter clinical study. *J Clin Microbiol* 58.  
347 <http://doi.org/10.1128/JCM.01643-19>.
- 348 24. Mohanty S, Sood S, Kapil A, Mittal S. 2010. Interobserver variation in the interpretation of  
349 Nugent scoring method for diagnosis of bacterial vaginosis. *Indian J Med Res* 131:88–91.  
350 <https://www.ncbi.nlm.nih.gov/pubmed/20167979>.
- 351 25. Zarakolu P, Sahin Hodoglugil NN, Aydin F, Tosun I, Gozalan A, Unal S. 2004. Reliability of  
352 interpretation of Gram-stained vaginal smears by Nugent’s scoring system for diagnosis of  
353 bacterial vaginosis. *Diagn Microbiol Infect Dis* 48:77–80.  
354 <http://doi.org/10.1016/j.diagmicrobio.2003.09.001>.
- 355 26. Cubuk ED, Zoph B, Shlens J, Le QV. 2019. RandAugment: Practical automated data  
356 augmentation with a reduced search space. *arXiv. cs.CV*. <http://arxiv.org/abs/1909.13719>.
- 357 27. Kanda Y. 2013. Investigation of the freely available easy-to-use software “EZR” for medical  
358 statistics. *Bone Marrow Transplant*. 48:452–458. <http://doi.org/10.1038/bmt.2012.244>.

359 **Figure 1.** Flowchart of the bacterial vaginosis model development and evaluation.

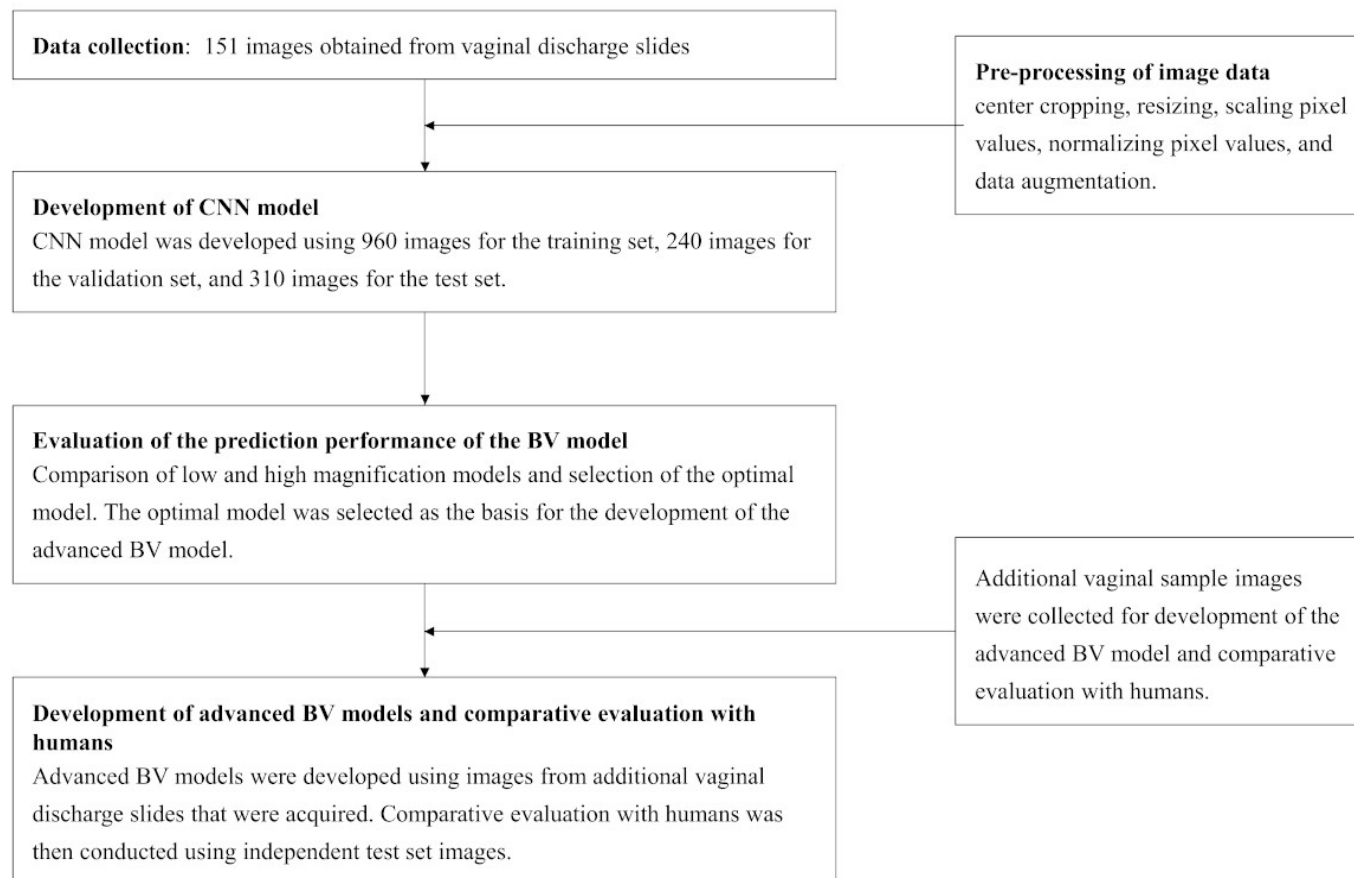

361 **Figure 2.** Microscopic images of vaginal discharge specimens and the Nugent Score categories.

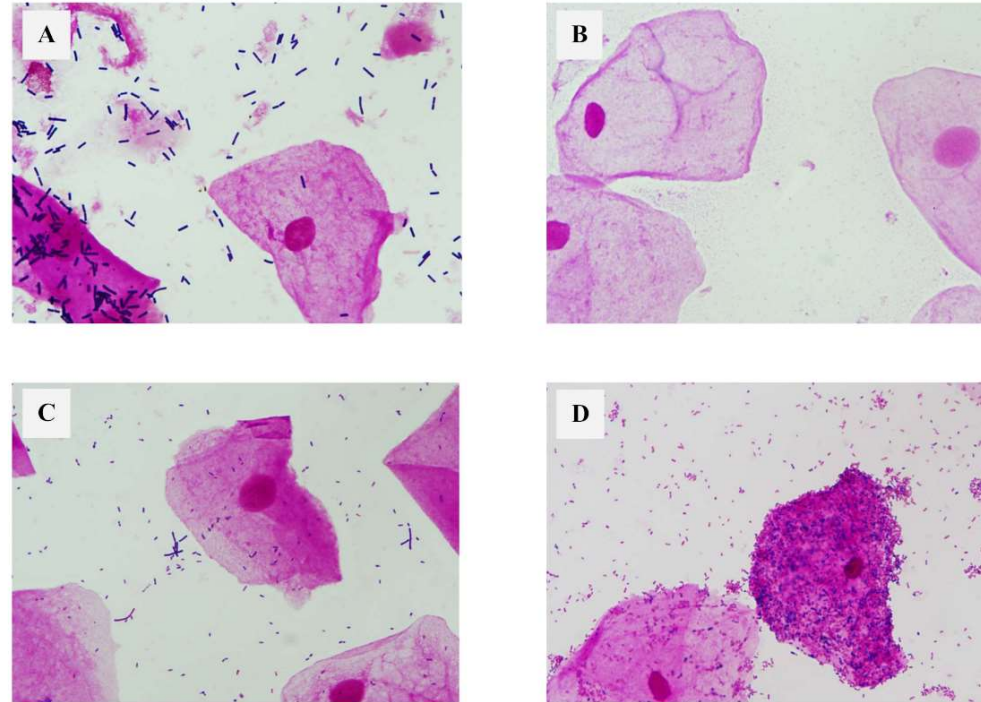

362

363 **Description:** Representative high-magnification images of vaginal discharge specimens, each categorized by the Nugent score. The  
364 images are labeled as follows: Image A representing a Nugent score of 0–3 for normal vaginal flora; Image B with score 4 indicating  
365 no vaginal flora; Image C with score 4–6 signifying altered vaginal flora; and Image D with score 7–10 representing bacterial  
366 vaginosis.

367 **TABLE 1.** Estimated group of BV models for true label

368

| True label        | No. of samples, low-magnification model |          |         |     | No. of samples, high-magnification model |          |         |     |
|-------------------|-----------------------------------------|----------|---------|-----|------------------------------------------|----------|---------|-----|
|                   | Normal                                  | No flora | Altered | BV  | Normal                                   | No flora | Altered | BV  |
| Normal (n = 70)   | 70                                      | 0        | 0       | 0   | 56                                       | 0        | 14      | 0   |
| No flora (n = 60) | 0                                       | 60       | 0       | 0   | 0                                        | 59       | 0       | 1   |
| Altered (n = 40)  | 8                                       | 0        | 12      | 20  | 0                                        | 0        | 38      | 2   |
| BV (n = 140)      | 0                                       | 10       | 12      | 118 | 0                                        | 1        | 15      | 124 |

369

370 **Footnotes:** Normal, normal vaginal flora; No flora, no vaginal flora; Altered, altered vaginal flora; BV, bacterial vaginosis.

371

372

373 **TABLE 2.** BV prediction comparison of low and high-magnification models

374

| Evaluation index                                  | Performance of CNN model |                          |
|---------------------------------------------------|--------------------------|--------------------------|
|                                                   | low-magnification model  | high-magnification model |
| Agreement rates in four-group classifications (%) |                          |                          |
| Normal vaginal flora (n = 70)                     | 90                       | 100                      |
| No vaginal flora (n = 60)                         | 86                       | 98                       |
| Altered vaginal flora (n = 40)                    | 50                       | 57                       |
| Bacterial vaginosis (n = 140)                     | 86                       | 98                       |
| Agreement rates in two-group classifications (%)  |                          |                          |
| Bacterial vaginosis (n = 180)                     | 100                      | 92                       |
| No bacterial vaginosis (n = 130)                  | 88                       | 99                       |
| Accuracy, (%)                                     |                          |                          |
| Four-group classifications                        | 84                       | 89                       |
| Two-group classifications                         | 94                       | 95                       |

375

376 **Description:** The agreement rate is defined as the percentage of results from the CNN model that matches the true label.

377

378 **TABLE 3.** Prediction performance of the advanced BV model

379

| Model or technician | Group    | True label         |                      |                     |                |
|---------------------|----------|--------------------|----------------------|---------------------|----------------|
|                     |          | Normal<br>(n = 61) | No flora<br>(n = 10) | Altered<br>(n = 14) | BV<br>(n = 21) |
| Advanced BV model   | Normal   | 61                 | 0                    | 4                   | 1              |
|                     | No flora | 0                  | 10                   | 0                   | 0              |
|                     | Altered  | 0                  | 0                    | 10                  | 1              |
|                     | BV       | 0                  | 0                    | 0                   | 19             |
| Technician 1        | Normal   | 61                 | 0                    | 2                   | 5              |
|                     | No flora | 0                  | 10                   | 0                   | 0              |
|                     | Altered  | 0                  | 0                    | 11                  | 6              |
|                     | BV       | 0                  | 0                    | 1                   | 10             |
| Technician 2        | Normal   | 58                 | 0                    | 0                   | 0              |
|                     | No flora | 0                  | 10                   | 0                   | 0              |
|                     | Altered  | 3                  | 0                    | 13                  | 0              |
|                     | BV       | 0                  | 0                    | 1                   | 21             |

380

381 **Footnotes:** Normal, normal vaginal flora; No flora, no vaginal flora; Altered, altered vaginal flora; BV, bacterial vaginosis.

382



383 **TABLE 4.** Prediction comparison between the advanced BV model and human experts

384

| <b>Group and evaluation index</b>  | <b>Advanced BV model</b> | <b>Technician average</b> | <b>Technician 1</b> | <b>Technician 2</b> |
|------------------------------------|--------------------------|---------------------------|---------------------|---------------------|
| Agreement rates in four groups (%) |                          |                           |                     |                     |
| Normal vaginal flora (n = 61)      | 92                       | 95                        | 90                  | 100                 |
| No vaginal flora (n = 10)          | 100                      | 100                       | 100                 | 100                 |
| Altered vaginal flora (n = 14)     | 91                       | 73                        | 65                  | 81                  |
| Bacterial vaginosis (n = 21)       | 100                      | 93                        | 91                  | 95                  |
| Agreement rates in two groups (%)  |                          |                           |                     |                     |
| Bacterial vaginosis (n = 35)       | 100                      | 96                        | 100                 | 92                  |
| No bacterial vaginosis (n = 71)    | 93                       | 96                        | 91                  | 100                 |
| Accuracy                           |                          |                           |                     |                     |
| Four group (%)                     | 94                       | 92                        | 87                  | 96                  |
| Two group (% , 95% CI)             | 95 (89–99)               | 95 (NA)                   | 93 (87–97)          | 97 (92–99)          |
| Sensitivity (% , 95% CI)           | 86 (70–95)               | 90 (NA)                   | 80 (63–92)          | 100 (86–100)        |
| Specificity (% , 95% CI)           | 100 (93–100)             | 98 (NA)                   | 100 (93–100)        | 96 (88–99)          |

385

386 **Footnotes:** NA, not applicable; Technician, laboratory technician.
